# Supplementary material for: Ataluren delays loss of ambulation and respiratory decline in nonsense mutation Duchenne muscular dystrophy patients
Source: PubMed Central journal article supplement — J Comp Eff Res. 2021 Nov 18;11(3):139–55. doi: 10.2217/cer-2021-0196 (PMC8787621; doi:10.2217/cer-2021-0196), 2021-11-18

**A. Age at predicted FVC <60%**

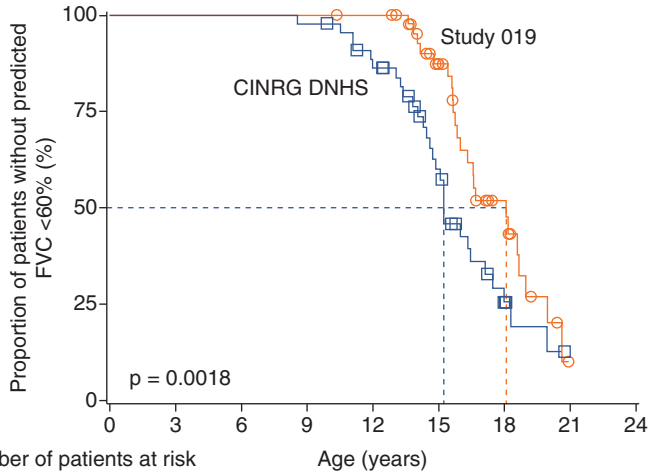

Number of patients at risk

|            | 45 | 45 | 45 | 45 | 44 | 30 | 12 | 0 | 0 |
|------------|----|----|----|----|----|----|----|---|---|
| Study 019  | 45 | 45 | 45 | 44 | 38 | 22 | 6  | 1 | 1 |
| CINRG DNHS | 45 | 45 | 45 | 44 | 38 | 22 | 6  | 1 | 1 |

**B. Age at predicted FVC <50%**

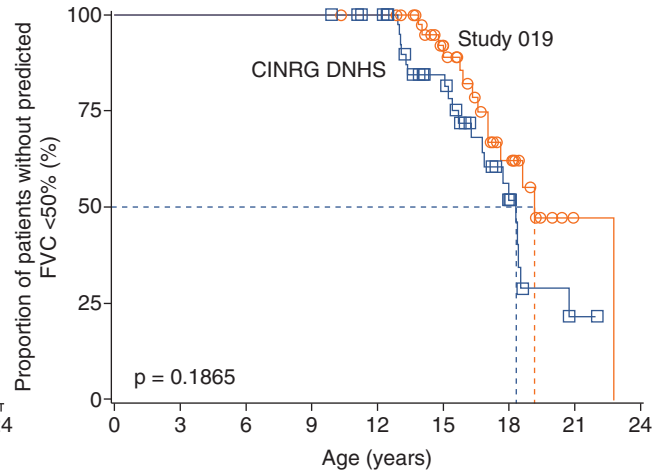

|            | 45 | 45 | 45 | 45 | 44 | 31 | 13 | 1 | 0 |
|------------|----|----|----|----|----|----|----|---|---|
| Study 019  | 45 | 45 | 45 | 45 | 42 | 28 | 11 | 2 | 1 |
| CINRG DNHS | 45 | 45 | 45 | 45 | 42 | 28 | 11 | 2 | 1 |

**C. Age at predicted FVC <30%**

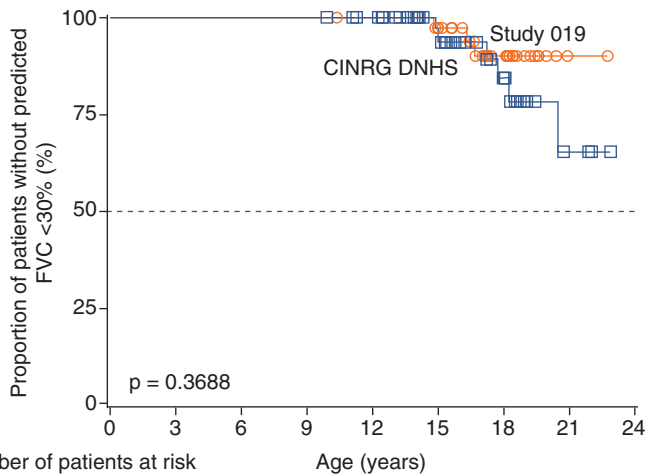

Number of patients at risk

|            | 45 | 45 | 45 | 45 | 44 | 33 | 16 | 1 | 0 |
|------------|----|----|----|----|----|----|----|---|---|
| Study 019  | 45 | 45 | 45 | 45 | 42 | 30 | 16 | 4 | 1 |
| CINRG DNHS | 45 | 45 | 45 | 45 | 42 | 30 | 16 | 4 | 1 |

**D. Age at predicted FVC <1 l**

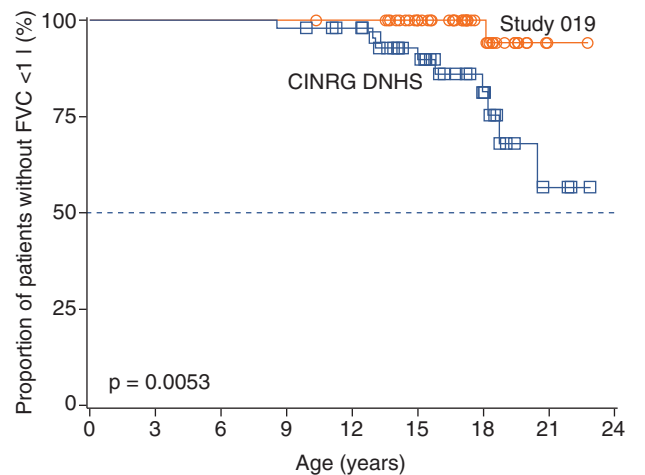

|            | 45 | 45 | 45 | 45 | 44 | 35 | 17 | 1 | 0 |
|------------|----|----|----|----|----|----|----|---|---|
| Study 019  | 45 | 45 | 45 | 44 | 41 | 30 | 16 | 4 | 1 |
| CINRG DNHS | 45 | 45 | 45 | 44 | 41 | 30 | 16 | 4 | 1 |

**E. Patient percentage predicted FVC against time since LoA**

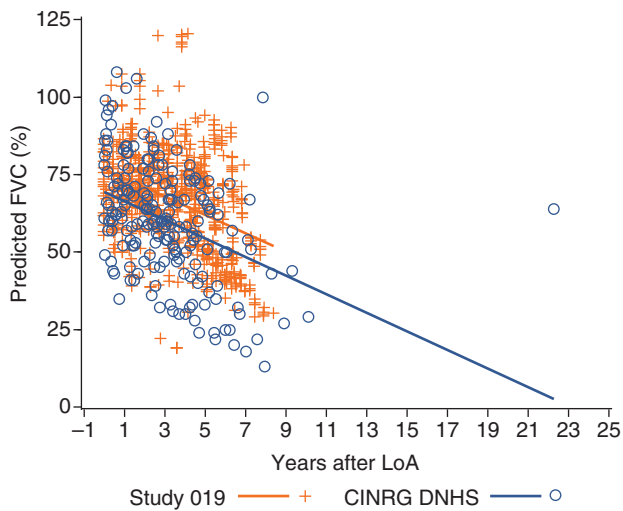

Supplement: cer-11-139-s2.pdf [file cer-11-139-s2.pdf]
