# Supplementary figures and images for: Ataluren delays loss of ambulation and respiratory decline in nonsense mutation Duchenne muscular dystrophy patients
Source: PubMed Central journal article supplement — J Comp Eff Res. 2021 Nov 18;11(3):139–55. doi: 10.2217/cer-2021-0196 (PMC8787621; doi:10.2217/cer-2021-0196), 2021-11-18

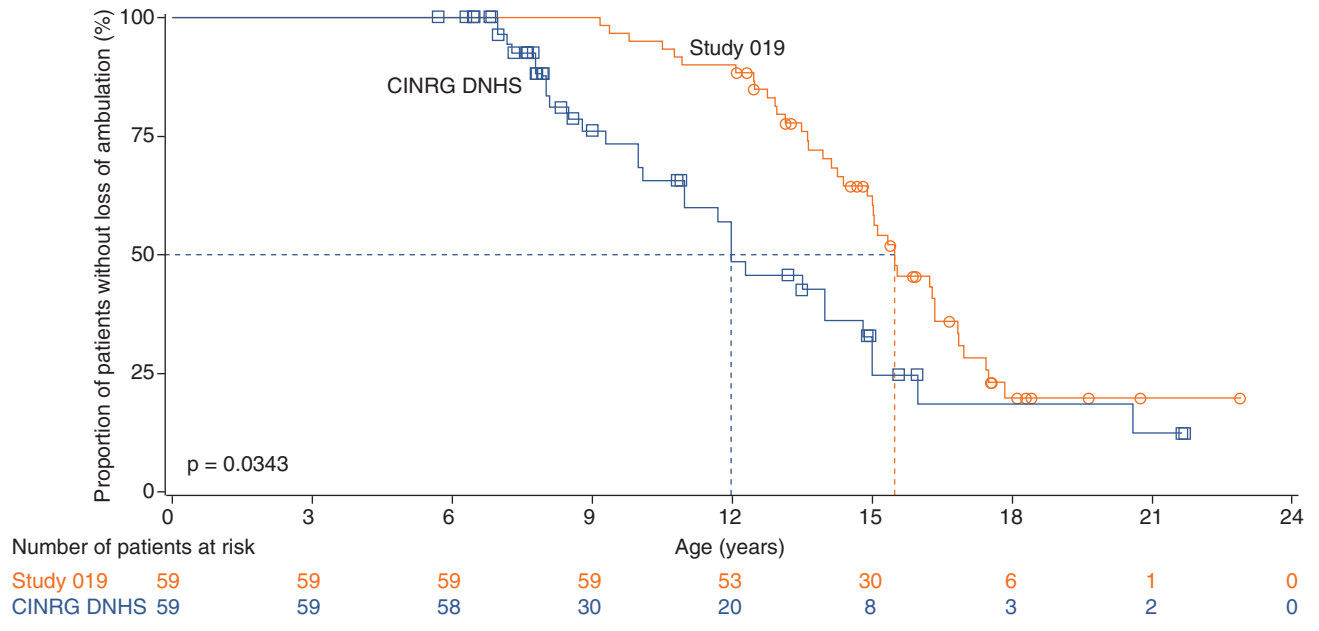

Supplement: cer-11-139-s1.pdf [file cer-11-139-s1.pdf]
